# Supplementary material
Source: HighWire-hosted journal article supplement (https://www.cmajopen.ca/highwire/filestream/81250/field_highwire_adjunct_files/0/2019-0034-1-at.pdf)
Supplement: 2019-0034-1-at.pdf [file 2019-0034-1-at.pdf]

**Appendix 1 (as supplied by the authors): Full survey results**

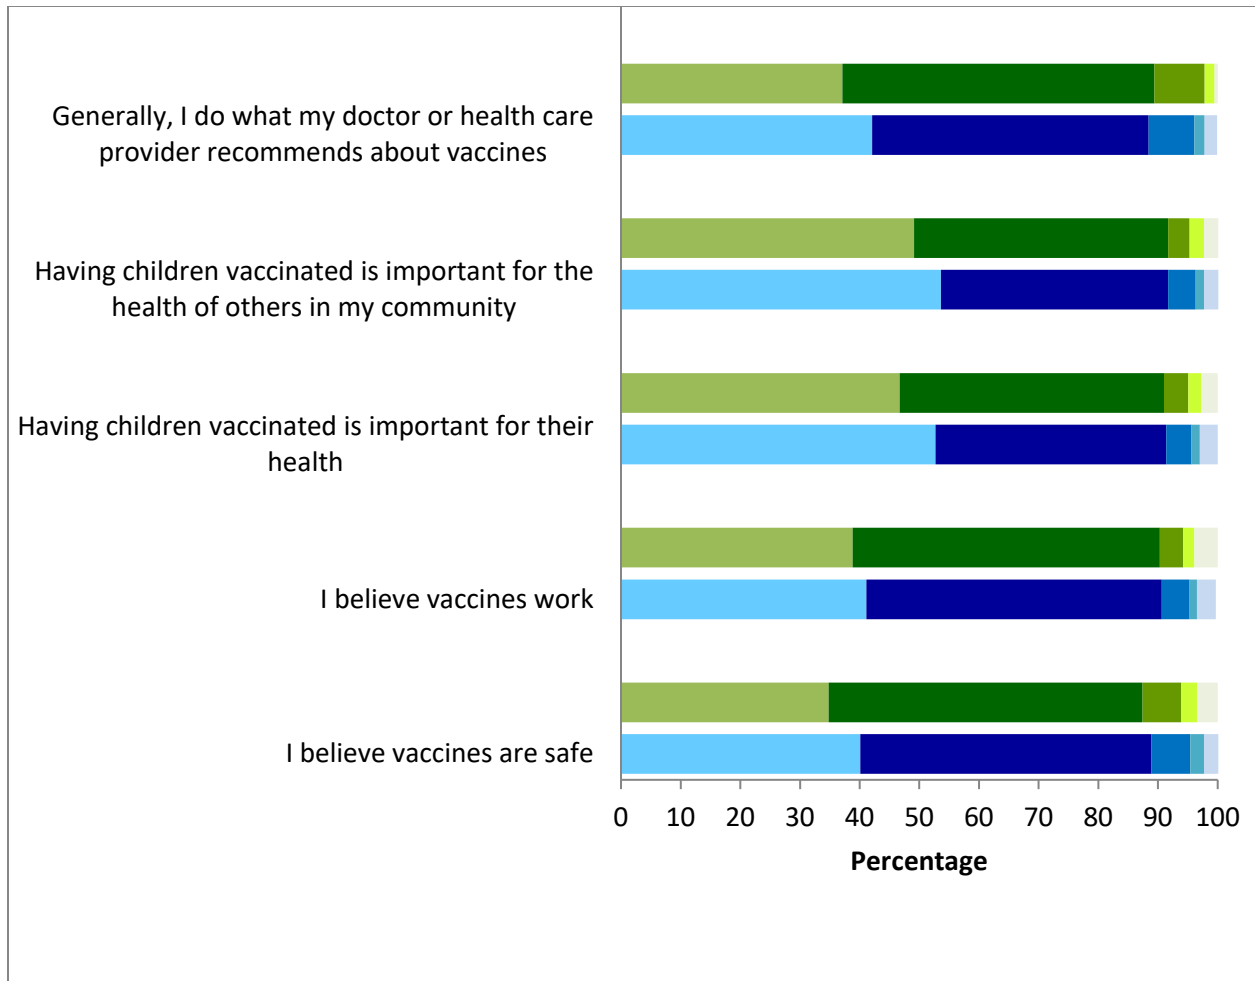

| Parents of children <19 years of age | Total participants              |
|--------------------------------------|---------------------------------|
| Strongly Agree                       | Strongly Agree                  |
| Agree                                | Agree                           |
| Disagree                             | Disagree                        |
| Strongly Disagree                    | Strongly Disagree               |
| Don't Know/Prefer not to Answer      | Don't Know/Prefer not to Answer |
